# Supplementary material
Source: PubMed Central journal article supplement (PMC4154138)
Supplement: NIHMS621355-supplement-Table_S1.pdf [file NIHMS621355-supplement-Table_S1.pdf]

Table S1

*Dogs that were excluded from Study 1, and reason for exclusion.*

| Dog Name | Breed                | Condition | Sex | Age (years) | Reason for Exclusion                      |
|----------|----------------------|-----------|-----|-------------|-------------------------------------------|
| Charlie  | Mixed: Lab           | A         | M   | 4           | Owner interference                        |
| Quimby   | Carolina Dog         | B         | M   | 9           | Abort criteria: Too many no choice trials |
| Norman   | Jack Russell Terrier | A         | M   | 4           | Abort criteria: Not food-motivated        |
| Spike    | Jack Russell Terrier | A         | M   | 4           | Experimenter error                        |
| Sam      | Mixed: Lab/Boxer     | B         | M   | 1           | Experimenter error                        |
| Kalle    | Mixed: Boxer/Pitt    | A         | F   | 5           | Abort criteria: Not food-motivated        |
| Dinky    | Australian Shep.     | B         | M   | 6           | Abort criteria: Too many no choice trials |
| Miles    | German Shepherd      | B         | M   | 4           | Abort criteria: Too many no choice trials |
| Jake     | Rottweiler           | B         | M   | 9           | Abort criteria: Too many no choice trials |
| Aspen    | Mixed: Bulldog       | A         | F   | 2           | No video                                  |
| Zep      | Austral. Cattle Dog  | B         | M   | 5           | No video                                  |
| Harley   | Mixed: Elk Hound     | B         | M   | 6           | Abort criteria: Too many no choice trials |
| Hope     | Great Pyrenees       | B         | F   | 5           | Abort criteria: Too many no choice trials |
| Lily     | Golden Retriever     | B         | F   | 10          | Abort criteria: Not food-motivated        |
| Roxy     | Austral. Cattle Dog  | B         | F   | 5           | Abort criteria: Too many no choice trials |

Context-specificity of inhibitory control in dogs  
*Animal Cognition*  
 Emily Bray, Evan MacLean, and Brian Hare  
 University of Pennsylvania; ebray@sas.upenn.edu
